# Supplementary material for: Allosteric communication in class A β-lactamases occurs via cooperative coupling of loop dynamics
Source: eLife journal article supplement (doi:10.7554/elife.66567), 2021-03-23

| Secondary Structure          | Residues               |                                  |                        |                           |
|------------------------------|------------------------|----------------------------------|------------------------|---------------------------|
|                              | TEM-1<br>(PDB id 1PZP) | TEM-1<br>Mutations               | KPC-2<br>(PDB id 6D18) | KPC-2<br>Mutations        |
| $\alpha_1$                   | 26-40                  | H26, E28, D35,<br>D38, Q39, L40, | 26-40                  |                           |
| $\alpha_1$ - $\beta_1$       | 41-42                  |                                  | 41-42                  |                           |
| $\beta_1$                    | 43-50                  | G41, A42                         | 43-50                  |                           |
| $\beta_1$ - $\beta_2$        | 51-55                  |                                  | 51-55                  |                           |
| $\beta_2$                    | 56-60                  | L57                              | 56-60                  |                           |
| $\beta_2$ - $\beta_3$        | 61-65                  |                                  | 61-65                  |                           |
| $\beta_3$                    | 66-67                  |                                  | 66-67                  |                           |
| $\beta_3$ - $\alpha_2$       | 68-71                  |                                  | 68-70                  |                           |
| $\alpha_2$                   | 72-85                  |                                  | 72-87                  |                           |
| $\alpha_2$ - $\beta_4$       | 86-93                  | Q90, G92                         | 88-93                  | D92, T93                  |
| $\beta_4$                    | 94-95                  |                                  | 94-95                  |                           |
| $\beta_4$ - $\alpha_3$       | 96-97                  |                                  | 96-97                  |                           |
| $\alpha_3$                   | 98-101                 | Q99, N100,                       | 98-102                 |                           |
| $\alpha_3$ -turn- $\alpha_4$ | 102-107                | E104, Y105, S106                 | 103-107                | P104, W105                |
| $\alpha_4$                   | 108-111                |                                  | 108-113                |                           |
| $\alpha_4$ - $\beta_5$       | 112-116                | T114, D115                       | 114-116                |                           |
| $\beta_5$                    | 117-118                |                                  | 117-118                |                           |
| $\alpha_5$                   | 119-129                |                                  | 119-129                |                           |
| $\alpha_5$ - $\alpha_6$      | 130-131                |                                  | 130                    |                           |
| $\alpha_6$                   | 132-142                |                                  | 131-142                |                           |
| $\alpha_6$ - $\alpha_7$      | 143-144                |                                  | 143-144                |                           |
| $\alpha_7$                   | 145-154                | H153                             | 145-155                | G147                      |
| $\alpha_7$ - $\alpha_8$      | 155-166                | M155, G156,<br>D157, H158        | 156-166                |                           |
| $\alpha_8$                   | 167-171                |                                  | 167-171                | L169                      |
| $\Omega$                     | 172-179                | I173, N175, D176                 | 172-179                | A172, D179                |
| $\beta_6$                    | 180-181                |                                  | 180-181                |                           |
| $\beta_6$ - $\alpha_9$       | 182                    |                                  | 182                    |                           |
| $\alpha_9$                   | 183-195                |                                  | 183-195                |                           |
| $\alpha_9$ - $\alpha_{10}$   | 196-200                | G196                             | 196-199                |                           |
| $\alpha_{10}$                | 201-212                | R204,                            | 200-213                | P202                      |
| Hinge                        | 213-218                | G218                             | 214-218                |                           |
| $\alpha_{11}$                | 219-224                | L220, L221, S223,<br>A224        | 219-225                |                           |
| $\alpha_{11}$ - $\beta_7$    | 225-229                |                                  | 226-229                |                           |
| $\beta_7$                    | 230-237                | F230                             | 230-237                |                           |
| $\beta_7$ - $\beta_8$        | 238-243                | G238, E240                       | 238-243                | V240, Y241, G242,<br>T243 |
| $\beta_8$                    | 244-251                |                                  | 244-251                |                           |
| $\beta_8$ - $\beta_9$        | 252-258                |                                  | 252-258                | T253                      |
| $\beta_9$                    | 259-266                |                                  | 259-266                |                           |
| $\beta_9$ - $\alpha_{12}$    | 267-272                | G267, S268, A270,<br>T271,       | 267-273                |                           |
| $\alpha_{12}$                | 273-288                | R275, N276, I279,<br>A280, A284  | 274-287                | H274                      |

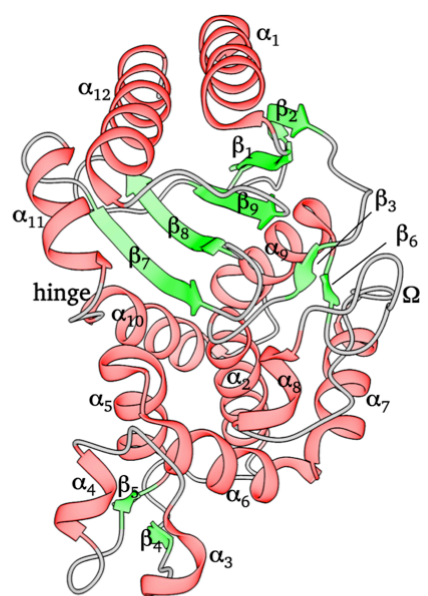

Supplement: supp [file elife-66567-supp-v2.zip]
