# Supplementary material for: Allosteric communication in class A β-lactamases occurs via cooperative coupling of loop dynamics
Source: eLife journal article supplement (doi:10.7554/elife.66567), 2021-03-23
Supplement: supp [file elife-66567-supp-v2.zip]

TEM-1 Apo<sub>EQ</sub>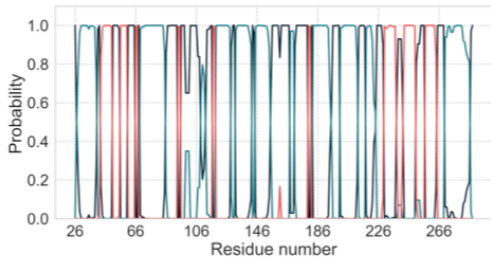

*sim.*

*crystal.*

TEM-1 IB<sub>EQ</sub>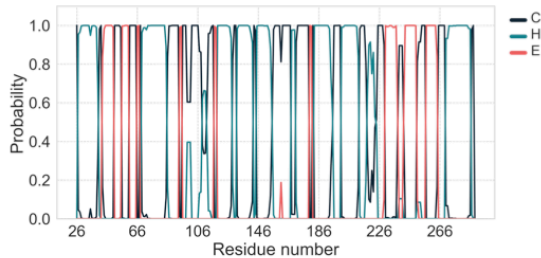

*sim.*

*crystal.*

KPC-2 Apo<sub>EQ</sub>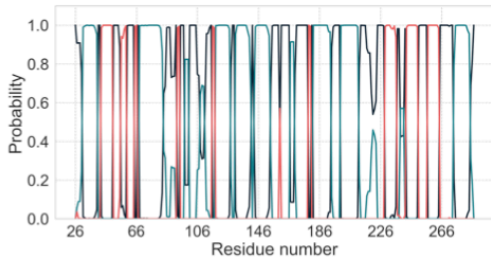

*sim.*

*crystal.*

KPC-2 IB<sub>EQ</sub>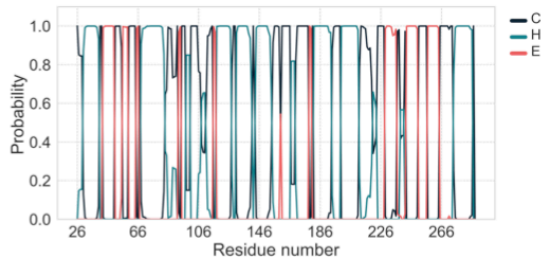

*sim.*

*crystal.*
