# Supplementary material for: Allosteric communication in class A β-lactamases occurs via cooperative coupling of loop dynamics
Source: eLife journal article supplement (doi:10.7554/elife.66567), 2021-03-23
Supplement: supp [file elife-66567-supp-v2.zip]

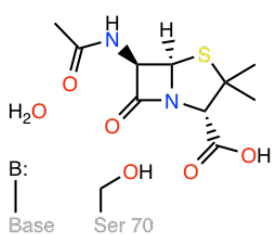

(1) enzyme-substrate complex

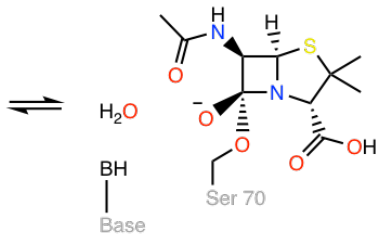

(2) acylation intermediate

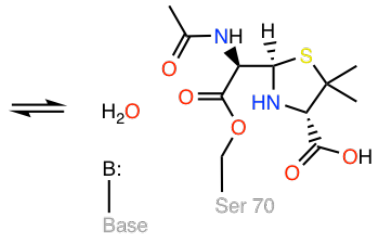

(3) acyl-enzyme adduct

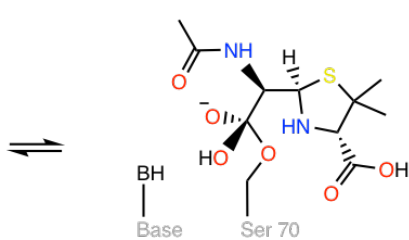

(4) deacylation intermediate

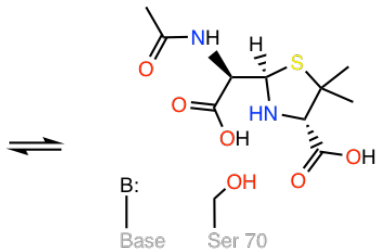

(5) enzyme-product complex
