# Supplementary figures and images for: Allosteric communication in class A β-lactamases occurs via cooperative coupling of loop dynamics
Source: eLife journal article supplement (doi:10.7554/elife.66567), 2021-03-23

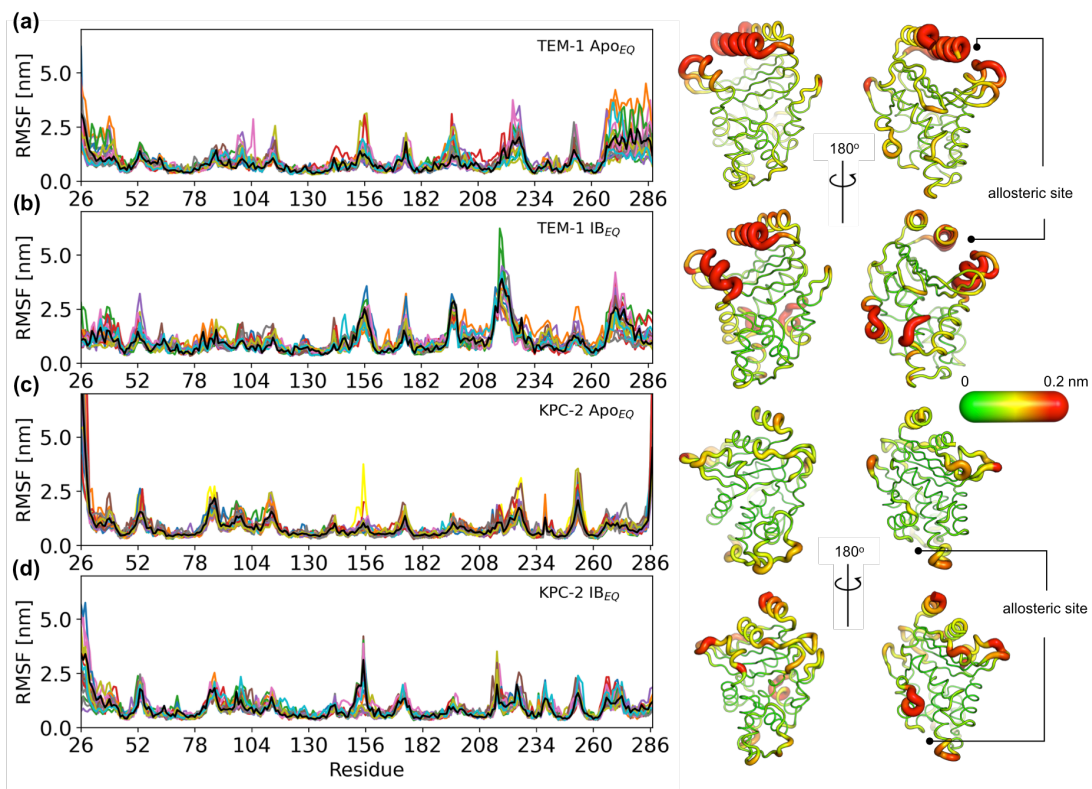

Supplement: supp [file elife-66567-supp-v2.zip]

**(a)** **TEM-1**

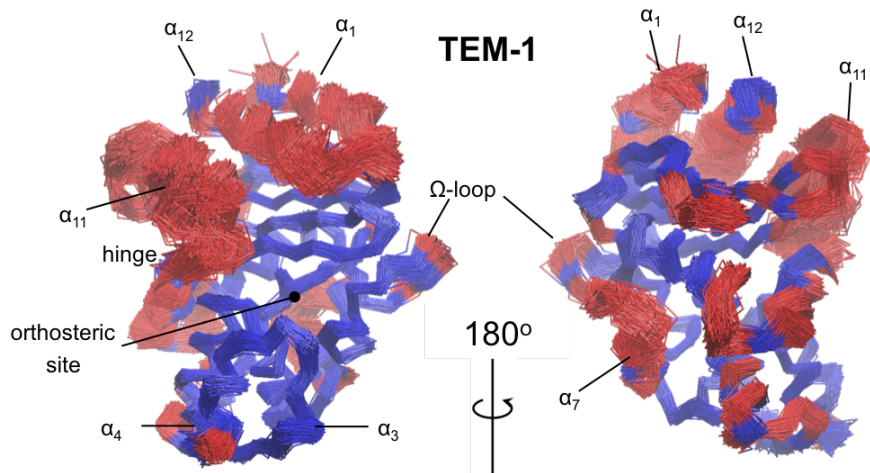

**(b)** **KPC-2**

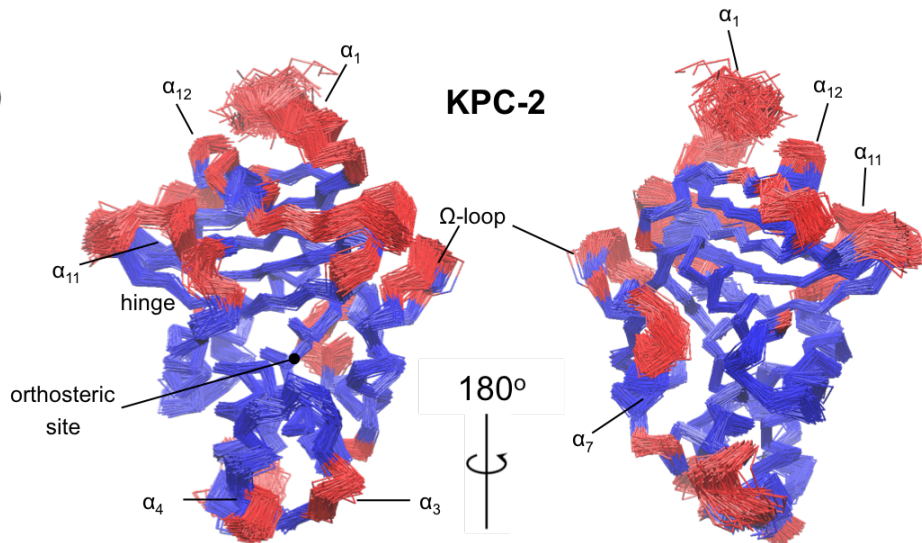

Supplement: supp [file elife-66567-supp-v2.zip]

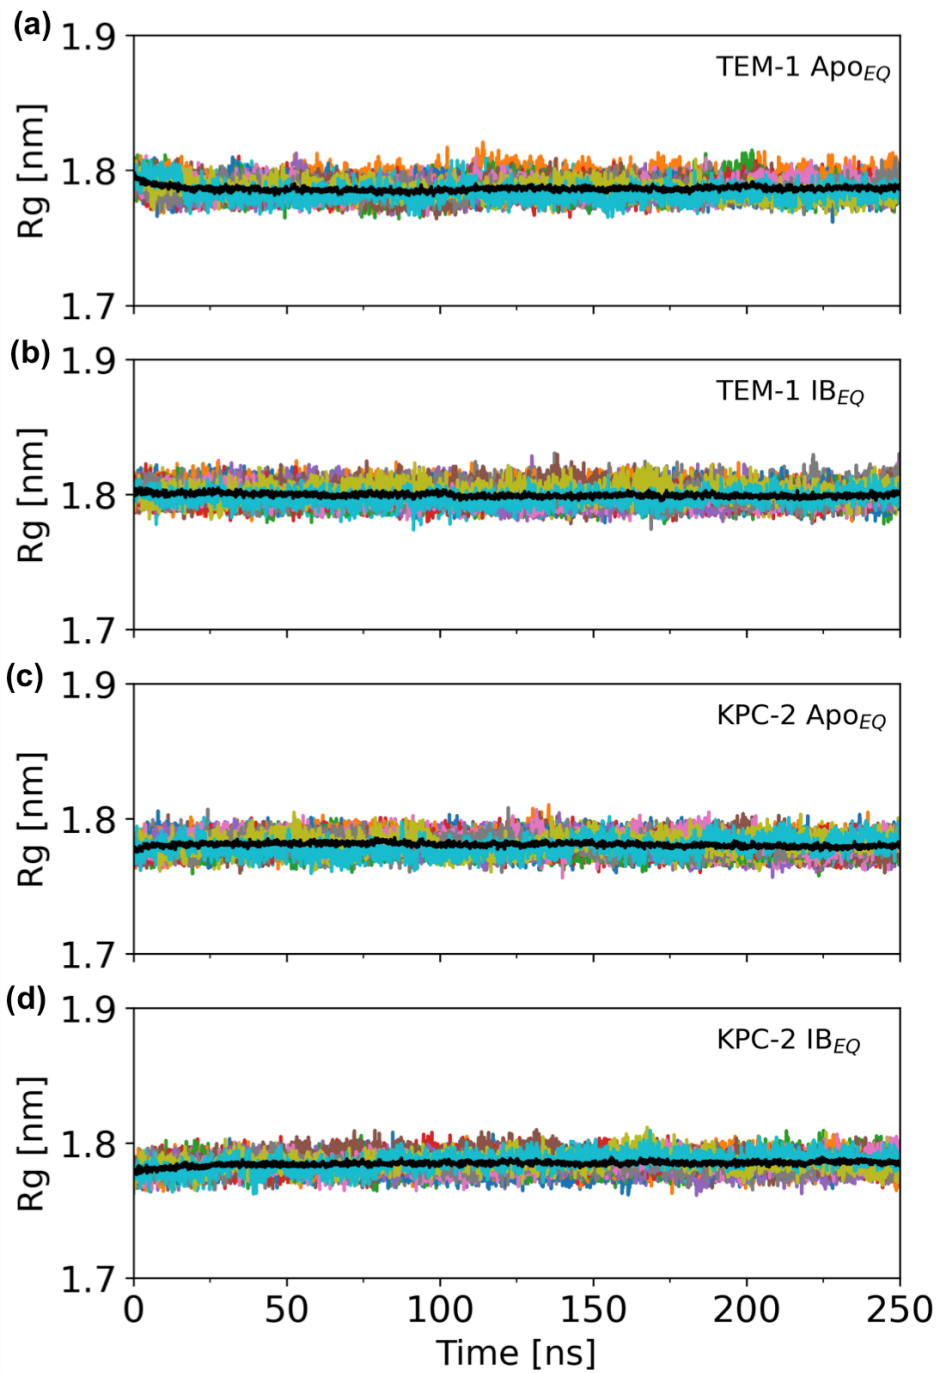

Supplement: supp [file elife-66567-supp-v2.zip]

**(a)**

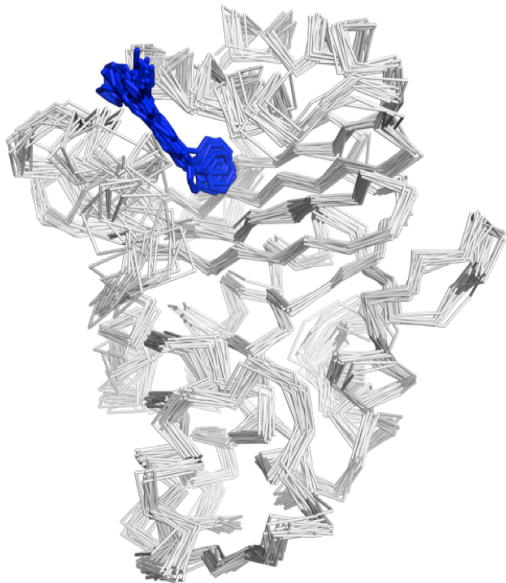

**(b)**

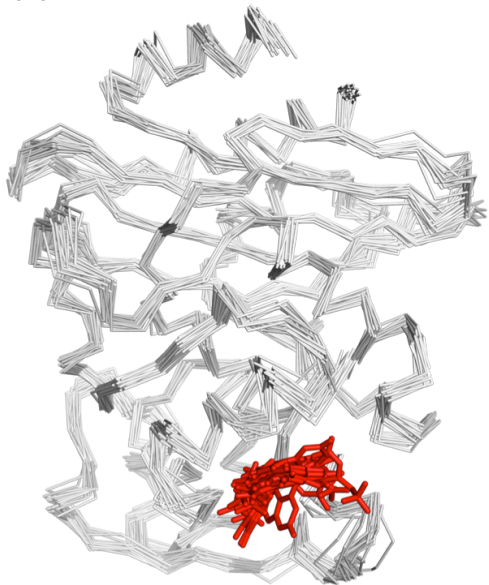

Supplement: supp [file elife-66567-supp-v2.zip]

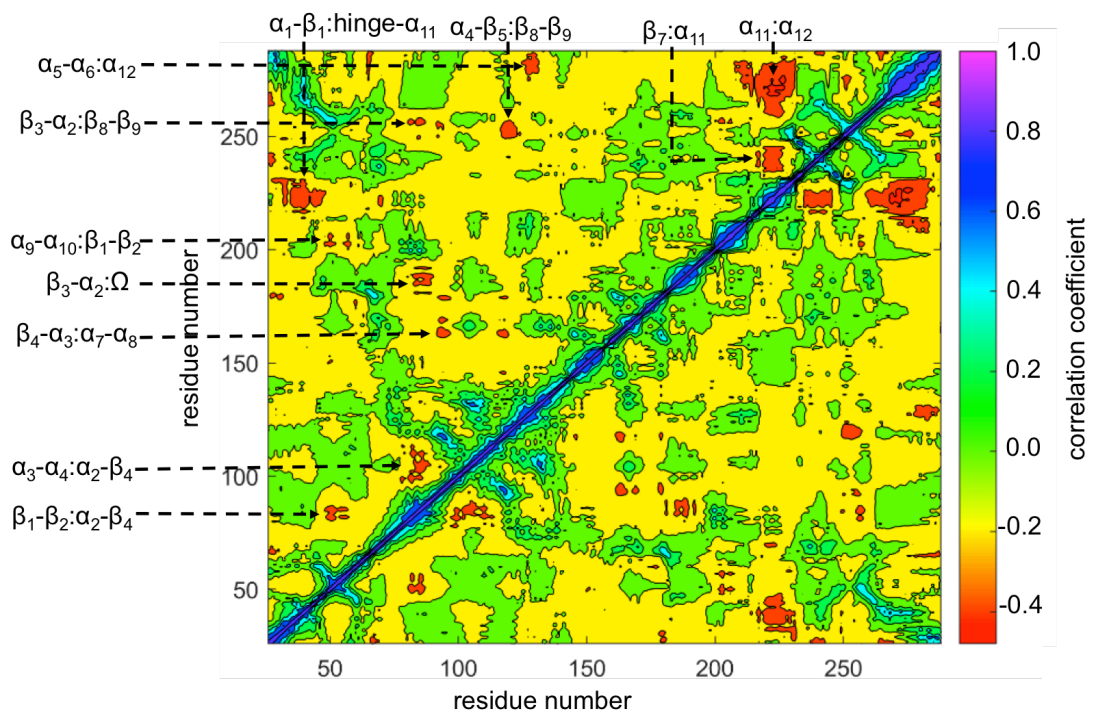

Supplement: supp [file elife-66567-supp-v2.zip]

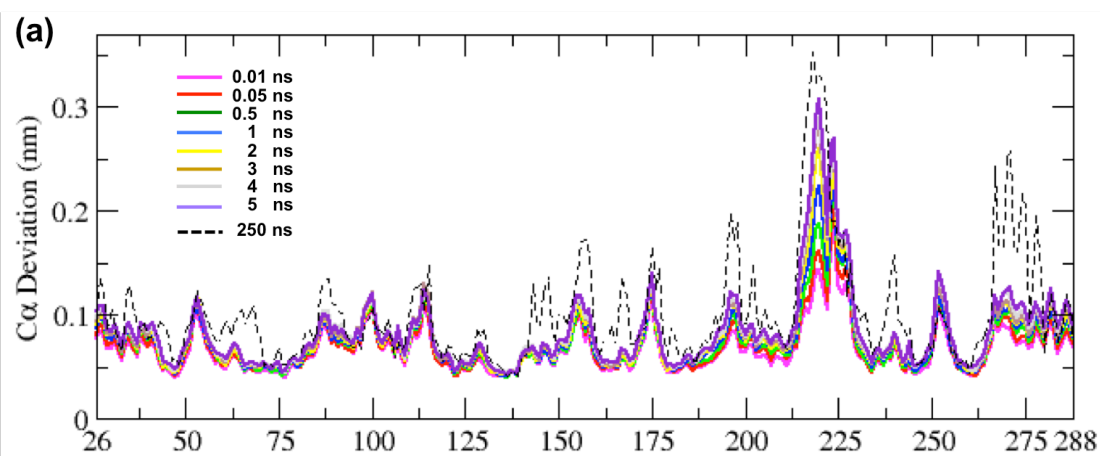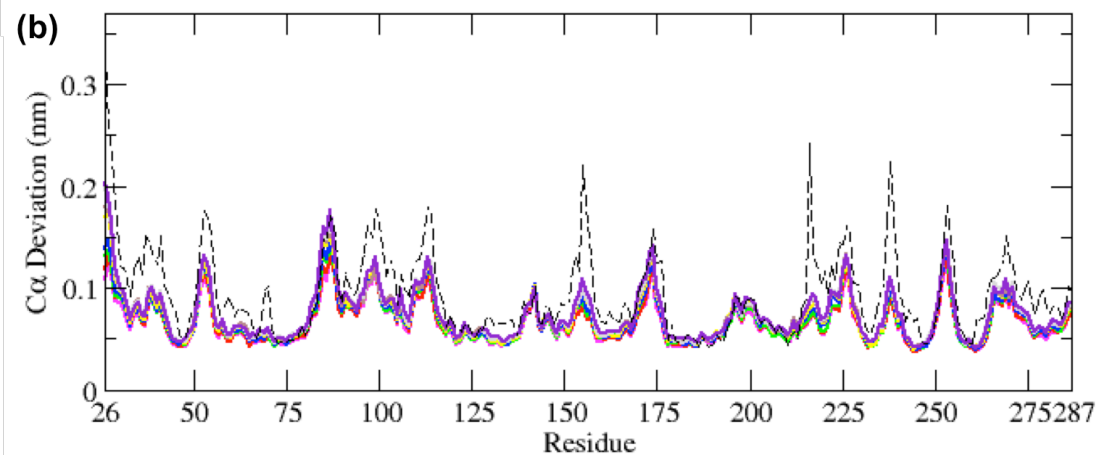

Supplement: supp [file elife-66567-supp-v2.zip]

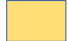

Long Equilibrium simulation (250ns)

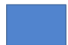

Short Non-Equilibrium simulation (5ns)

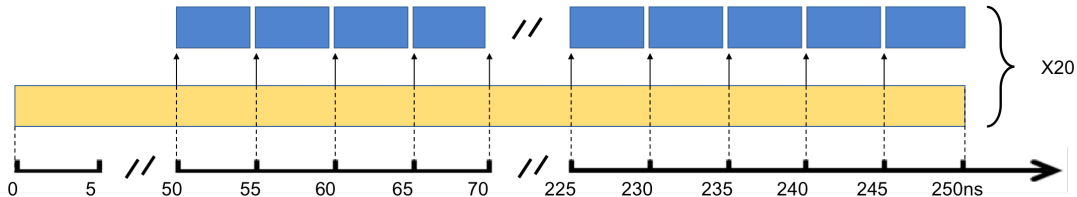

Supplement: supp [file elife-66567-supp-v2.zip]

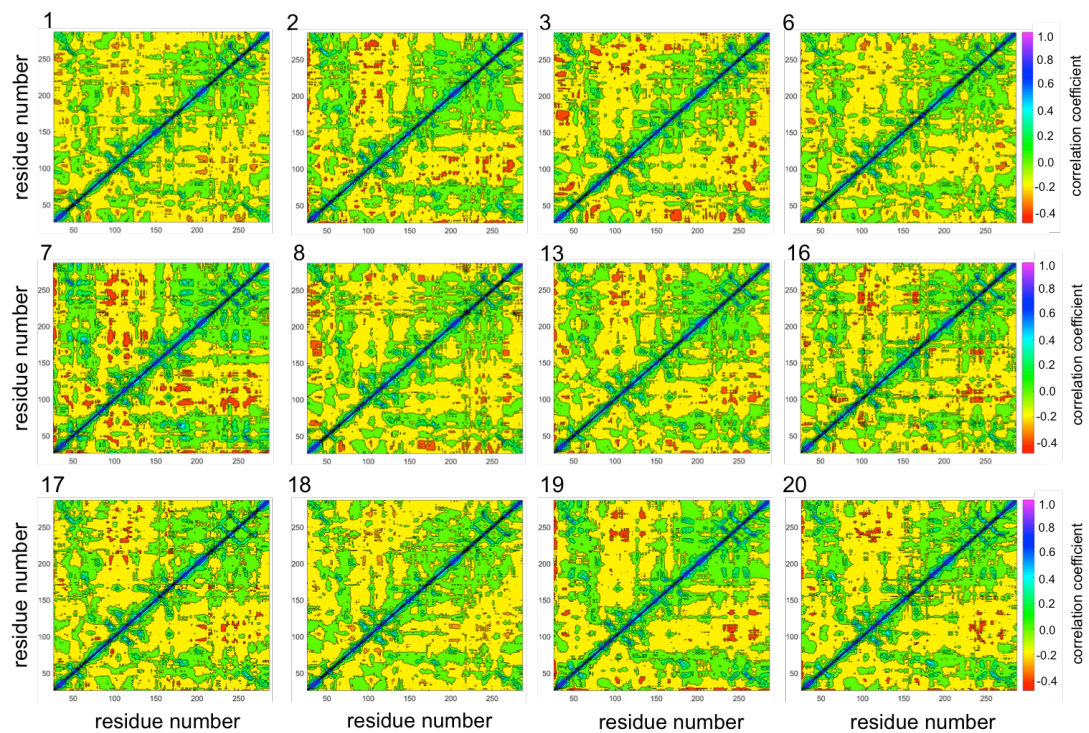

Supplement: supp [file elife-66567-supp-v2.zip]

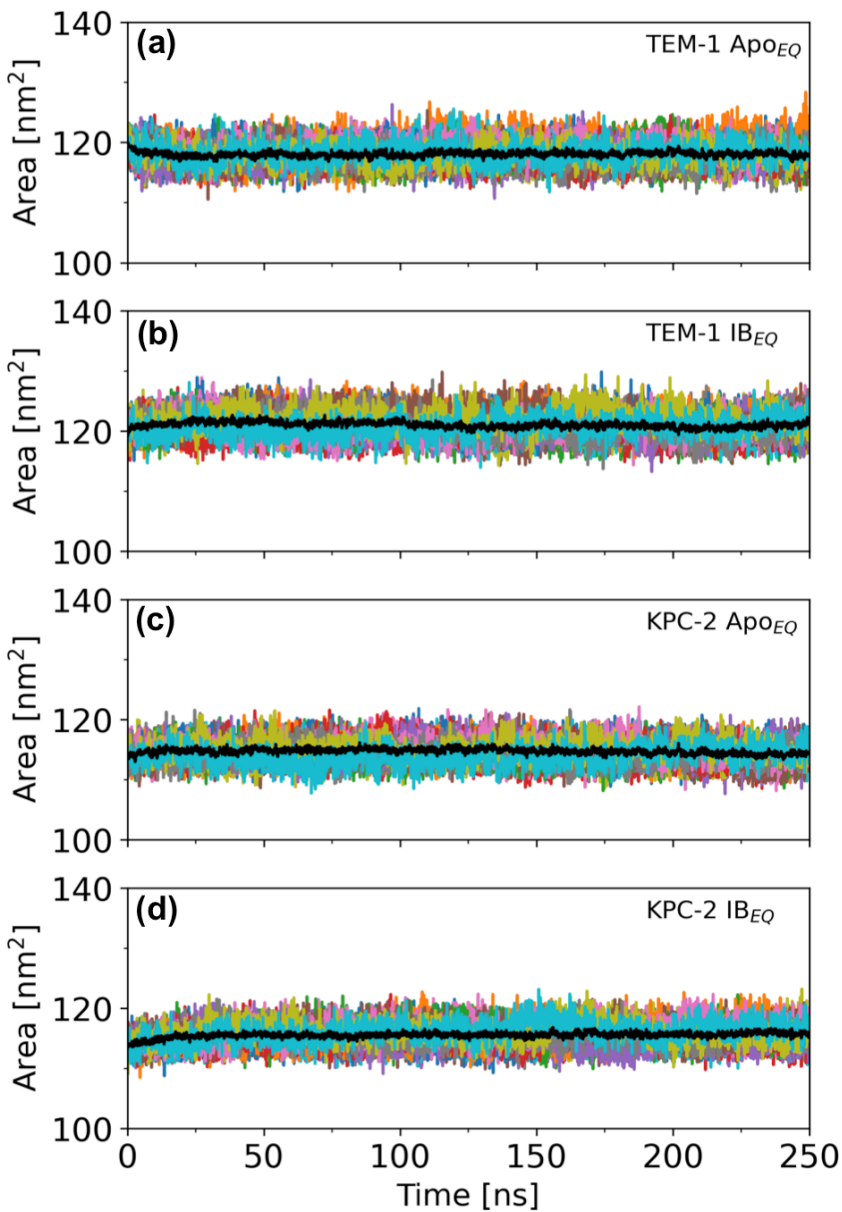

Supplement: supp [file elife-66567-supp-v2.zip]

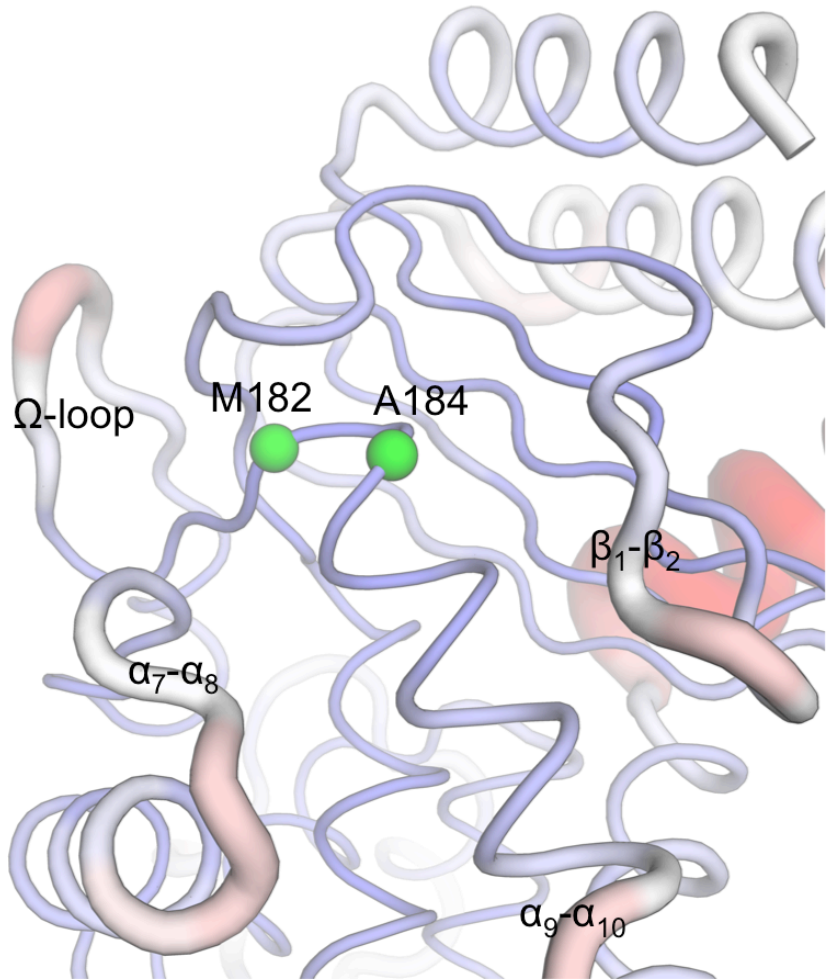

Supplement: supp [file elife-66567-supp-v2.zip]

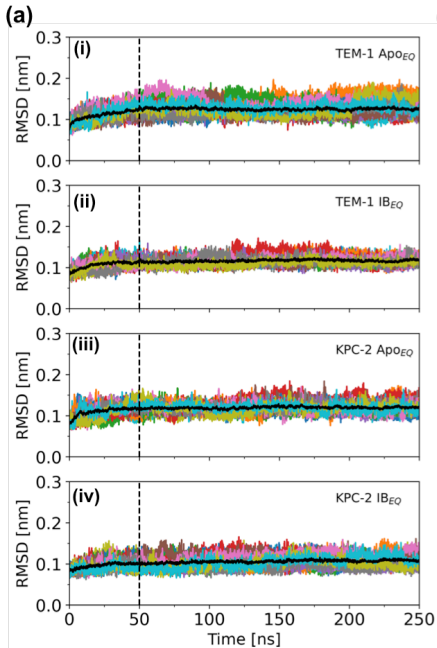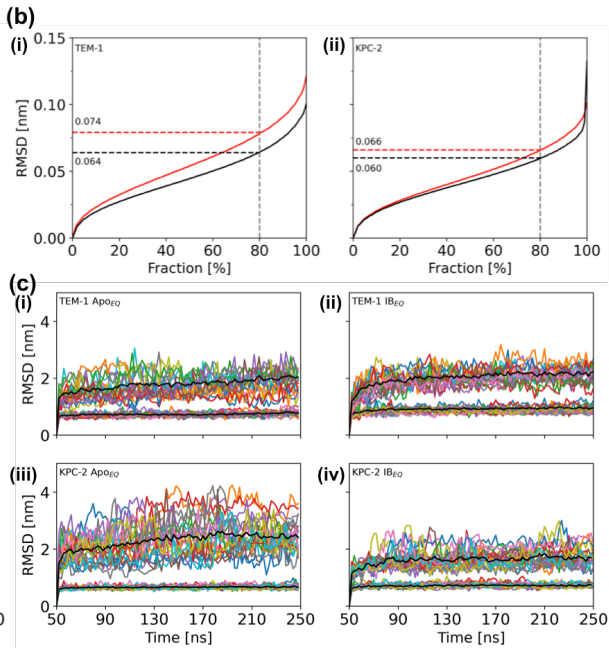

Supplement: supp [file elife-66567-supp-v2.zip]
